# Supplementary material
Source: MDPI journal article supplement (https://www.mdpi.com/search?q=forests-11-01234)
Supplement: s001 [file forests-11-01234-s001.pdf]

**Table S1.** Foliar habit of the species recorded in this study

| Species                                          | Foliar Habit | Reference                 |
|--------------------------------------------------|--------------|---------------------------|
| <i>Acacia angustissima</i>                       | Deciduous    | Tropical Plants [1]       |
| <i>Acacia cochliacantha</i>                      | Deciduous    | Naturalista [2]           |
| <i>Acacia cornigera</i>                          | Deciduous    | F. Tun-Dzul [3]           |
| <i>Acacia dolichostachya</i>                     | Deciduous    | Pennington & Sarukhán [4] |
| <i>Acacia farnesiana</i>                         | Evergreen    | Vázquez-Yanes et al. [5]  |
| <i>Acacia galpinii</i>                           | Deciduous    | Tropical Plants [1]       |
| <i>Acacia gentlei</i>                            | Evergreen    | Kewscience [7]            |
| <i>Acacia globulifera</i>                        | Evergreen    | Kewscience [7]            |
| <i>Acacia millefolia</i>                         | Evergreen    | Kewscience [7]            |
| <i>Vachellia pennatula</i>                       | Deciduous    | Sanaphre-Villanueva [8]   |
| <i>Acacia polyphylla</i>                         | Deciduous    | Tropical Plants [1]       |
| <i>Acacia riparia</i>                            | Evergreen    | Kewscience [7]            |
| <i>Acacia roemeriana</i>                         | Evergreen    | Kewscience [7]            |
| <i>Acacia tequilana</i>                          | Evergreen    | Kewscience [7]            |
| <i>Acrocomia aculeata</i>                        | Evergreen    | Tropical Plants [1]       |
| <i>Agonandra macrocarpa</i>                      | Evergreen    | F. Tun-Dzul [3]           |
| <i>Agonandra obtusifolia</i>                     | Evergreen    | F. Tun-Dzul [3]           |
| <i>Albizia guachapele</i>                        | Evergreen    | Tropical Plants [1]       |
| <i>Albizia leucocalyx</i>                        | Evergreen    | Tropical Plants [1]       |
| <i>Albizia niopoides</i>                         | Deciduous    | Tropical Plants [1]       |
| <i>Albizia tomentosa</i>                         | Evergreen    | Kewscience [7]            |
| <i>Allophylus cominia</i>                        | Evergreen    | F. May-Pat [9]            |
| <i>Alseis yucatanensis</i>                       | Deciduous    | Pennington & Sarukhán [4] |
| <i>Alvaradoa amorphoides</i>                     | Evergreen    | Treeworld wholesale [10]  |
| <i>Amphilophium crucigerum</i>                   | Deciduous    | F. May-Pat [9]            |
| <i>Amphilophium paniculatum var. molle</i>       | Evergreen    | F. May-Pat [9]            |
| <i>Amphilophium paniculatum var. paniculatum</i> | Evergreen    | F. May-Pat [9]            |
| <i>Amyris elemifera</i>                          | Evergreen    | Tropical Plants [1]       |
| <i>Amyris sylvatica</i>                          | Evergreen    | Tropical Plants [1]       |
| <i>Annona glabra</i>                             | Evergreen    | Tropical Plants [1]       |
| <i>Annona purpurea</i>                           | Deciduous    | Powers & Tiffin [11]      |
| <i>Annona reticulata</i>                         | Deciduous    | Powers & Tiffin [11]      |
| <i>Apoplanesia paniculata</i>                    | Evergreen    | Kewscience [7]            |
| <i>Ardisia escallonioides</i>                    | Evergreen    | F. Tun-Dzul [3]           |
| <i>Asemnantha pubescens</i>                      | Evergreen    | F. May-Pat [9]            |
| <i>Astrocasia tremula</i>                        | Deciduous    | F. May-Pat [9]            |
| <i>Astronium graveolens</i>                      | Deciduous    | Powers & Tiffin [11]      |
| <i>Attilaea abalak</i>                           | Deciduous    | F. May-Pat [9]            |
| <i>Avicennia germinans</i>                       | Evergreen    | Pennington & Sarukhán [4] |
| <i>Bauhinia divaricata</i>                       | Deciduous    | F. Tun-Dzul [3]           |
| <i>Bauhinia herrerae</i>                         | Deciduous    | F. Tun-Dzul [3]           |
| <i>Bauhinia unguolata</i>                        | Deciduous    | Sanaphre-Villanueva [8]   |

|                                 |           |                                             |
|---------------------------------|-----------|---------------------------------------------|
| <i>Beaucarnea pliabilis</i>     | Evergreen | F. Tun-Dzul [3]                             |
| <i>Bernardia dodecandra</i>     | Evergreen | F. May-Pat [9]                              |
| <i>Bignonia diversifolia</i>    | Evergreen | F. May-Pat [9]                              |
| <i>Bignonia heterophylla</i>    | Evergreen | F. May-Pat [9]                              |
| <i>Bignonia potosina</i>        | Evergreen | F. May-Pat [9]                              |
| <i>Blomia prisca</i>            | Evergreen | F. May-Pat [9]                              |
| <i>Bonellia flammea</i>         | Evergreen | F. Tun-Dzul [3]                             |
| <i>Bonellia macrocarpa</i>      | Evergreen | F. Tun-Dzul [3]                             |
| <i>Bourreria mollis</i>         | Evergreen | F. May-Pat [9]                              |
| <i>Bourreria oxyphylla</i>      | Evergreen | F. May-Pat [9]                              |
| <i>Bourreria pulchra</i>        | Deciduous | Huechacona-Ruiz [6]                         |
| <i>Brosimum alicastrum</i>      | Evergreen | Powers & Tiffin [11]                        |
| <i>Bucida buceras</i>           | Evergreen | Tropical Plants [1]                         |
| <i>Bunchosia glandulosa</i>     | Evergreen | F. May-Pat [9]                              |
| <i>Bunchosia swartziana</i>     | Evergreen | F. Tun-Dzul [3]                             |
| <i>Bursera graveolens</i>       | Deciduous | F. May-Pat [9]                              |
| <i>Bursera infernidialis</i>    | Deciduous | F. May-Pat [9]                              |
| <i>Bursera instabilis</i>       | Deciduous | Pennington & Sarukhán [4]                   |
| <i>Bursera isthmica</i>         | Deciduous | F. May-Pat [9]                              |
| <i>Bursera schlechtendalii</i>  | Deciduous | F. Tun-Dzul [3]                             |
| <i>Bursera simaruba</i>         | Deciduous | Huechacona-Ruiz [6]                         |
| <i>Bursera submoniliformis</i>  | Deciduous | F. May-Pat [9]                              |
| <i>Buxus bartletii</i>          | Evergreen | F. May-Pat [9]                              |
| <i>Byrsonima bucidifolia</i>    | Deciduous | F. Tun-Dzul [3]                             |
| <i>Byrsonima crassifolia</i>    | Deciduous | Powers & Tiffin [11]                        |
| <i>Caesalpinia bonduc</i>       | Evergreen | Kewscience [7]                              |
| <i>Caesalpinia gaumeri</i>      | Deciduous | Huechacona-Ruiz [6]                         |
| <i>Caesalpinia mollis</i>       | Deciduous | Henricus-Franciscus & Navarro-Mártínez [12] |
| <i>Caesalpinia platyloba</i>    | Evergreen | Kewscience [7]                              |
| <i>Caesalpinia pulcherrima</i>  | Deciduous | Tropical Plants [1]                         |
| <i>Caesalpinia vesicaria</i>    | Evergreen | Kewscience [7]                              |
| <i>Caesalpinia yucatanensis</i> | Deciduous | F. Tun-Dzul [3]                             |
| <i>Calliandra belizensis</i>    | Evergreen | Kewscience [7]                              |
| <i>Callicarpa acuminata</i>     | Deciduous | F. May-Pat [9]                              |
| <i>Calyptanthus pallens</i>     | Evergreen | Sanaphre-Villanueva [8]                     |
| <i>Cameraria latifolia</i>      | Evergreen | F. Tun-Dzul [3]                             |
| <i>Capparis flexuosa</i>        | Evergreen | F. May-Pat [9]                              |
| <i>Capparis verrucosa</i>       | Evergreen | F. May-Pat [9]                              |
| <i>Cardispermum halicacabum</i> | Deciduous | Tropical Plants [1]                         |
| <i>Carica papaya</i>            | Evergreen | Vázquez-Yanes, et al. [5]                   |
| <i>Cascabela gaumeri</i>        | Evergreen | F. Tun-Dzul [3]                             |
| <i>Cascabela thevetia</i>       | Evergreen | F. Tun-Dzul [3]                             |
| <i>Casearia corymbosa</i>       | Deciduous | Powers & Tiffin [11]                        |
| <i>Casearia emarginata</i>      | Evergreen | F. May-Pat [9]                              |
| <i>Casearia sylvestris</i>      | Evergreen | F. May-Pat [9]                              |

|                                                |           |                           |
|------------------------------------------------|-----------|---------------------------|
| <i>Casimiroa tetrameria</i>                    | Evergreen | Sanaphre-Villanueva [8]   |
| <i>Cassine xylocarpa</i>                       | Evergreen | Tropical Plants [1]       |
| <i>Cecropia obtusifolia</i>                    | Evergreen | Vázquez-Yanes, et al. [5] |
| <i>Cecropia peltata</i>                        | Evergreen | Tropical Plants [1]       |
| <i>Cedrela odorata</i>                         | Deciduous | Powers & Tiffin [11]      |
| <i>Ceiba aesculifolia</i>                      | Deciduous | Pennington & Sarukhán [4] |
| <i>Ceiba pentandra</i>                         | Deciduous | Vázquez-Yanes, et al. [5] |
| <i>Ceiba schottii</i>                          | Deciduous | F. Tun-Dzul [3]           |
| <i>Celtis iguanaea</i>                         | Evergreen | Naturalista [2]           |
| <i>Celtis trinervia</i>                        | Evergreen | Naturalista [2]           |
| <i>Chamaecrista mimosoides</i>                 | Evergreen | Tropical Plants [1]       |
| <i>Chamaedorea neurochlamys</i>                | Evergreen | Kewscience [7]            |
| <i>Chiococca alba</i>                          | Evergreen | Kewscience [7]            |
| <i>Chloroleucon mangense</i>                   | Deciduous | Huechacona-Ruiz [6]       |
| <i>Chloroleucon mangense var. leucospermum</i> | Evergreen | Kewscience [7]            |
| <i>Chlorophora tinctoria</i>                   | Deciduous | Pennington & Sarukhán [4] |
| <i>Chrysobalanus icaco</i>                     | Evergreen | Kewscience [7]            |
| <i>Chrysophyllum cainito</i>                   | Evergreen | Naturalista [2]           |
| <i>Chrysophyllum mexicanum</i>                 | Evergreen | Tropical Plants [1]       |
| <i>Cissus gossypifolia</i>                     | Deciduous | F. May-Pat [9]            |
| <i>Cissus microcarpa</i>                       | Evergreen | F. May-Pat [9]            |
| <i>Citharexylum hexangulare</i>                | Evergreen | F. May-Pat [9]            |
| <i>Clusia flava</i>                            | Evergreen | F. Tun-Dzul [3]           |
| <i>Cnidocolobus aconitifolius</i>              | Deciduous | F. Tun-Dzul [3]           |
| <i>Coccoloba acapulcensis</i>                  | Deciduous | Huechacona-Ruiz [6]       |
| <i>Coccoloba barbadosensis</i>                 | Evergreen | Pennington & Sarukhán [4] |
| <i>Coccoloba belizensis</i>                    | Evergreen | F. May-Pat [9]            |
| <i>Coccoloba caracasana</i>                    | Evergreen | F. May-Pat [9]            |
| <i>Coccoloba cozumelensis</i>                  | Evergreen | F. Tun-Dzul [3]           |
| <i>Coccoloba diversifolia</i>                  | Evergreen | Flores[13]                |
| <i>Coccoloba humboldtii</i>                    | Evergreen | F. May-Pat [9]            |
| <i>Coccoloba spicata</i>                       | Evergreen | Huechacona-Ruiz [6]       |
| <i>Cochlospermum vitifolium</i>                | Deciduous | Huechacona-Ruiz [6]       |
| <i>Cojoba arborea</i>                          | Deciduous | Pennington & Sarukhán [4] |
| <i>Colubrina arborescens</i>                   | Evergreen | Tropical Plants [1]       |
| <i>Colubrina elliptica</i>                     | Evergreen | Treeworld [10]            |
| <i>Colubrina greggii</i>                       | Evergreen | F. May-Pat [9]            |
| <i>Conocarpus erectus</i>                      | Evergreen | Pennington & Sarukhán [4] |
| <i>Cordia alliodora</i>                        | Deciduous | Powers & Tiffin [11]      |
| <i>Cordia curassavica</i>                      | Evergreen | F. May-Pat [9]            |
| <i>Cordia dodecandra</i>                       | Deciduous | Pennington & Sarukhán [4] |
| <i>Cordia gerascanthus</i>                     | Evergreen | F. May-Pat [9]            |
| <i>Cordia sebestena</i>                        | Evergreen | Tropical Plants [1]       |
| <i>Cornutia pyramidata</i>                     | Evergreen | F. May-Pat [9]            |
| <i>Cosmocalyx spectabilis</i>                  | Evergreen | F. May-Pat [9]            |

|                                                   |           |                           |
|---------------------------------------------------|-----------|---------------------------|
| <i>Crescentia cujete</i>                          | Evergreen | Pennington & Sarukhán [4] |
| <i>Croton arboreus</i>                            | Evergreen | F. Tun-Dzul [3]           |
| <i>Croton draco</i>                               | Deciduous | Pennington & Sarukhán [4] |
| <i>Croton glabellus</i>                           | Evergreen | Plantas y Hongos [14]     |
| <i>Croton icche</i>                               | Evergreen | F. May-Pat [9]            |
| <i>Croton nitens</i>                              | Evergreen | F. May-Pat [9]            |
| <i>Croton niveus</i>                              | Evergreen | F. May-Pat [9]            |
| <i>Croton ramillatus</i>                          | Evergreen | F. May-Pat [9]            |
| <i>Croton reflexifolius</i>                       | Evergreen | F. Tun-Dzul [3]           |
| <i>Cryosophila stauracantha</i>                   | Evergreen | Naturalista [2]           |
| <i>Cynanchum schlechtendalii</i>                  | Evergreen | Sanaphre-Villanueva [8]   |
| <i>Dalbergia glabra</i>                           | Evergreen | Kewscience [7]            |
| <i>Dendropanax arboreus</i>                       | Evergreen | Vázquez-Yanes, et al. [5] |
| <i>Desmoncus quasillarius</i>                     | Evergreen | Tropical Plants [1]       |
| <i>Diospyros acapulcensis subsp. verae-crucis</i> | Deciduous | Plant Database [15]       |
| <i>Diospyros anisandra</i>                        | Evergreen | F. Tun-Dzul [3]           |
| <i>Diospyros campechiana</i>                      | Evergreen | F. May-Pat [9]            |
| <i>Diospyros cuneata</i>                          | Evergreen | Huechacona-Ruiz [6]       |
| <i>Diospyros salicifolia</i>                      | Evergreen | F. Tun-Dzul [3]           |
| <i>Diospyros tetrasperma</i>                      | Evergreen | Huechacona-Ruiz [6]       |
| <i>Diospyros yatesiana</i>                        | Evergreen | Earth.com [16]            |
| <i>Diospyros yucatanensis</i>                     | Evergreen | F. Tun-Dzul [3]           |
| <i>Diphysa carthagenensis</i>                     | Evergreen | Naturalista [2]           |
| <i>Dolichandra unguis-cati</i>                    | Evergreen | Infojardín [19]           |
| <i>Drypetes lateriflora</i>                       | Evergreen | F. May-Pat [9]            |
| <i>Ebenopsis ebano</i>                            | Deciduous | Pennington & Sarukhán [4] |
| <i>Ehretia tinifolia</i>                          | Evergreen | Huechacona-Ruiz [6]       |
| <i>Enriquebeltrania crenatifolia</i>              | Deciduous | F. May-Pat [9]            |
| <i>Enterolobium cyclocarpum</i>                   | Deciduous | Powers & Tiffin [11]      |
| <i>Erythrina standleyana</i>                      | Deciduous | F. Tun-Dzul [3]           |
| <i>Erythroxylum areolatum</i>                     | Evergreen | F. May-Pat [9]            |
| <i>Erythroxylum confusum</i>                      | Evergreen | F. Tun-Dzul [3]           |
| <i>Erythroxylum rotundifolium</i>                 | Evergreen | Huechacona-Ruiz [6]       |
| <i>Esenbeckia pentaphylla</i>                     | Evergreen | Naturalista [2]           |
| <i>Eugenia axillaris</i>                          | Evergreen | Sanaphre-Villanueva [8]   |
| <i>Eugenia foetida</i>                            | Evergreen | F. Tun-Dzul [3]           |
| <i>Eugenia itzana</i>                             | Evergreen | F. May-Pat [9]            |
| <i>Eugenia karwinskyana</i>                       | Evergreen | F. May-Pat [9]            |
| <i>Eugenia macrocarpa</i>                         | Evergreen | F. May-Pat [9]            |
| <i>Eugenia mayana</i>                             | Evergreen | F. May-Pat [9]            |
| <i>Eugenia uniflora</i>                           | Evergreen | Kewscience [7]            |
| <i>Eupatorium albicaule</i>                       | Evergreen | F. May-Pat [9]            |
| <i>Euphorbia schlechtendalii</i>                  | Evergreen | Naturalista [2]           |
| <i>Exostema caribaeum</i>                         | Evergreen | Sanaphre-Villanueva [8]   |
| <i>Exostema mexicanum</i>                         | Evergreen | F. May-Pat [9]            |

|                                         |           |                                             |
|-----------------------------------------|-----------|---------------------------------------------|
| <i>Exothea diphylla</i>                 | Evergreen | F. May-Pat [9]                              |
| <i>Ficus aurea</i>                      | Evergreen | EcuRed [17]                                 |
| <i>Ficus carica</i>                     | Evergreen | Vázquez-Yanes, et al. [5]                   |
| <i>Ficus colubrinae</i>                 | Evergreen | Kewscience [7]                              |
| <i>Ficus cordata subsp. salicifolia</i> | Evergreen | F. Tun-Dzul [3]                             |
| <i>Ficus cotinifolia</i>                | Evergreen | Pennington & Sarukhán [4]                   |
| <i>Ficus lapathifolia</i>               | Evergreen | Tropical Plants [1]                         |
| <i>Ficus pertusa</i>                    | Evergreen | Tropical Plants [1]                         |
| <i>Ficus trigonata</i>                  | Evergreen | Flora Virtual [18]                          |
| <i>Forchhammeria longifolia</i>         | Evergreen | F. May-Pat [9]                              |
| <i>Forchhammeria trifoliata</i>         | Evergreen | EcuRed [17]                                 |
| <i>Fridericia floribunda</i>            | Evergreen | F. Tun-Dzul [3]                             |
| <i>Fridericia podopogon</i>             | Evergreen | F. Tun-Dzul [3]                             |
| <i>Garcinia intermedia</i>              | Evergreen | Pennington & Sarukhán [4]                   |
| <i>Gliricidia sepium</i>                | Deciduous | Powers & Tiffin [11]                        |
| <i>Guaiacum sanctum</i>                 | Deciduous | Henricus-Franciscus & Navarro-Mártínez [11] |
| <i>Guazuma ulmifolia</i>                | Deciduous | Powers & Tiffin [11]                        |
| <i>Guettarda combsii</i>                | Evergreen | F. Tun-Dzul [3]                             |
| <i>Guettarda elliptica</i>              | Evergreen | F. May-Pat [9]                              |
| <i>Guettarda gaumeri</i>                | Evergreen | F. May-Pat [9]                              |
| <i>Guettarda macrosperma</i>            | Evergreen | F. May-Pat [9]                              |
| <i>Gymnanthes lucida</i>                | Evergreen | Tropical Plants [1]                         |
| <i>Gymnopodium floribundum</i>          | Deciduous | Huechacona-Ruiz [6]                         |
| <i>Gyrocarpus jatrophifolius</i>        | Deciduous | Pennington & Sarukhán [4]                   |
| <i>Haematoxylum brasiletto</i>          | Deciduous | Tropical Plants [1]                         |
| <i>Haematoxylum campechianum</i>        | Deciduous | Tropical Plants [1]                         |
| <i>Hamelia patens</i>                   | Evergreen | Tropical Plants [1]                         |
| <i>Hampea trilobata</i>                 | Deciduous | F. Tun-Dzul [3]                             |
| <i>Harpalyce formosa</i>                | Evergreen | Kewscience [7]                              |
| <i>Harpalyce rupicola</i>               | Evergreen | Kewscience [7]                              |
| <i>Havardia albicans</i>                | Deciduous | F. Tun-Dzul [3]                             |
| <i>Helicteres baruensis</i>             | Evergreen | F. May-Pat [9]                              |
| <i>Heliocarpus donnellsmithii</i>       | Deciduous | Pennington & Sarukhán [4]                   |
| <i>Heteropterys brachiata</i>           | Evergreen | F. May-Pat [9]                              |
| <i>Heteropterys laurifolia</i>          | Evergreen | F. May-Pat [9]                              |
| <i>Hintonia octomera</i>                | Evergreen | F. May-Pat [9]                              |
| <i>Hippocratea celastroides</i>         | Evergreen | F. Tun-Dzul [3]                             |
| <i>Hiraea reclinata</i>                 | Evergreen | F. May-Pat [9]                              |
| <i>Hybanthus yucatanensis</i>           | Evergreen | F. May-Pat [9]                              |
| <i>Hyperbaena winzerlingii</i>          | Evergreen | F. Tun-Dzul [3]                             |
| <i>Inga vera</i>                        | Evergreen | Pennington & Sarukhán [4]                   |
| <i>Ipomoea wolcottiana</i>              | Deciduous | Pennington & Sarukhán [4]                   |
| <i>Jacaratia mexicana</i>               | Deciduous | Tropical Plants [1]                         |
| <i>Jatropha curcas</i>                  | Evergreen | Tropical Plants [1]                         |
| <i>Jatropha gaumeri</i>                 | Deciduous | Huechacona-Ruiz [6]                         |

|                                   |           |                           |
|-----------------------------------|-----------|---------------------------|
| <i>Karwinskia humboldtiana</i>    | Evergreen | Sanaphre-Villanueva [8]   |
| <i>Karwinskia umbellata</i>       | Evergreen | F. May-Pat [9]            |
| <i>Krugiodendron ferreum</i>      | Evergreen | F. Tun-Dzul [3]           |
| <i>Laetia thamnia</i>             | Deciduous | Naturalista [2]           |
| <i>Lafoensia puniceifolia</i>     | Evergreen | Tropical Plants [1]       |
| <i>Laguncularia racemosa</i>      | Evergreen | Pennington & Sarukhán [4] |
| <i>Leucaena lanceolata</i>        | Deciduous | Tropical Plants [1]       |
| <i>Leucaena leucocephala</i>      | Deciduous | Sanaphre-Villanueva [8]   |
| <i>Licaria peckii</i>             | Evergreen | F. May-Pat [9]            |
| <i>Lonchocarpus acuminatus</i>    | Evergreen | Kewscience [7]            |
| <i>Lonchocarpus castilloi</i>     | Evergreen | Tropical Plants [1]       |
| <i>Lonchocarpus guatemalensis</i> | Deciduous | Tropical Plants [1]       |
| <i>Lonchocarpus hondurensis</i>   | Evergreen | Tropical Plants [1]       |
| <i>Lonchocarpus longistylus</i>   | Evergreen | Kewscience [7]            |
| <i>Lonchocarpus parviflorus</i>   | Evergreen | Kewscience [7]            |
| <i>Lonchocarpus punctatus</i>     | Evergreen | Tropical Plants [1]       |
| <i>Lonchocarpus robustus</i>      | Evergreen | Kewscience [7]            |
| <i>Lonchocarpus rugosus</i>       | Evergreen | Kewscience [7]            |
| <i>Lonchocarpus xuul</i>          | Deciduous | Huechacona-Ruiz [6]       |
| <i>Lonchocarpus yucatanensis</i>  | Evergreen | F. May-Pat [9]            |
| <i>Luehea candida</i>             | Evergreen | F. May-Pat [9]            |
| <i>Luehea seemannii</i>           | Evergreen | Tropical Plants [1]       |
| <i>Luehea speciosa</i>            | Deciduous | Sanaphre-Villanueva [8]   |
| <i>Lysiloma divaricatum</i>       | Deciduous | Powers & Tiffin [11]      |
| <i>Lysiloma latisiliquum</i>      | Deciduous | Huechacona-Ruiz [6]       |
| <i>Machaonia lindeniana</i>       | Evergreen | F. May-Pat [9]            |
| <i>Maclura tinctoria</i>          | Deciduous | Powers & Tiffin [11]      |
| <i>Malmea depressa</i>            | Evergreen | Tropical Plants [1]       |
| <i>Malpighia emarginata</i>       | Deciduous | F. Tun-Dzul [3]           |
| <i>Malpighia glabra</i>           | Deciduous | F. Tun-Dzul [3]           |
| <i>Manihot aesculifolia</i>       | Deciduous | F. May-Pat [9]            |
| <i>Manilkara zapota</i>           | Evergreen | Vázquez-Yanes, et al. [5] |
| <i>Mansoa verrucifera</i>         | Deciduous | Sanaphre-Villanueva [8]   |
| <i>Margaritaria nobilis</i>       | Deciduous | Tropical Plants [1]       |
| <i>Margaritopsis microdon</i>     | Evergreen | F. May-Pat [9]            |
| <i>Mariosousa dolichostachya</i>  | Evergreen | Kewscience [7]            |
| <i>Matayba oppositifolia</i>      | Evergreen | F. May-Pat [9]            |
| <i>Melicoccus oliviformis</i>     | Evergreen | Huechacona-Ruiz [6]       |
| <i>Metopium brownei</i>           | Deciduous | Vázquez-Yanes, et al. [5] |
| <i>Mimosa bahamensis</i>          | Deciduous | Huechacona-Ruiz [6]       |
| <i>Montanoa atriplicifolia</i>    | Deciduous | F. May-Pat [9]            |
| <i>Mosannonna depressa</i>        | Evergreen | Tropical Plants [1]       |
| <i>Muntingia calabura</i>         | Deciduous | Vázquez-Yanes, et al. [5] |
| <i>Nectandra coriacea</i>         | Evergreen | Tropical Plants [1]       |
| <i>Nectandra salicifolia</i>      | Evergreen | F. Tun-Dzul [3]           |

|                                   |           |                           |
|-----------------------------------|-----------|---------------------------|
| <i>Neea psychotrioides</i>        | Evergreen | Huechacona-Ruiz [6]       |
| <i>Neomillspaughia emarginata</i> | Deciduous | Huechacona-Ruiz [6]       |
| <i>Nopalea gaumeri</i>            | Evergreen | F. May-Pat [9]            |
| <i>Nopalea inaperta</i>           | Evergreen | F. May-Pat [9]            |
| <i>Ormosia schippii</i>           | Evergreen | Kewscience [7]            |
| <i>Otopappus guatemalensis</i>    | Deciduous | F. May-Pat [9]            |
| <i>Otopappus scaber</i>           | Deciduous | F. May-Pat [9]            |
| <i>Pachira aquatica</i>           | Evergreen | Pennington & Sarukhán [4] |
| <i>Painteria leptophylla</i>      | Evergreen | Kewscience [7]            |
| <i>Parathesis cubana</i>          | Evergreen | F. Tun-Dzul [3]           |
| <i>Parmentiera aculeata</i>       | Deciduous | Pennington & Sarukhán [4] |
| <i>Parmentiera millspaughiana</i> | Deciduous | F. May-Pat [9]            |
| <i>Paullinia cururu</i>           | Evergreen | F. May-Pat [9]            |
| <i>Phyllanthus acuminatus</i>     | Deciduous | F. May-Pat [9]            |
| <i>Phyllostylon brasiliense</i>   | Deciduous | Pennington & Sarukhán [4] |
| <i>Pilocarpus racemosus</i>       | Evergreen | Kewscience [7]            |
| <i>Pilosocereus gaumeri</i>       | Evergreen | F. May-Pat [9]            |
| <i>Pimenta dioica</i>             | Evergreen | Vázquez-Yanes, et al. [5] |
| <i>Piper amalago</i>              | Evergreen | Tropical Plants [1]       |
| <i>Piper sempervirens</i>         | Evergreen | F. Tun-Dzul [3]           |
| <i>Piscidia piscipula</i>         | Deciduous | Huechacona-Ruiz [6]       |
| <i>Pisonia aculeata</i>           | Evergreen | Tropical Plants [1]       |
| <i>Pithecellobium dulce</i>       | Evergreen | Vázquez-Yanes, et al. [5] |
| <i>Platymiscium yucatanum</i>     | Evergreen | F. Tun-Dzul [3]           |
| <i>Plumeria obtusa</i>            | Deciduous | F. Tun-Dzul [3]           |
| <i>Plumeria rubra</i>             | Deciduous | Vázquez-Yanes, et al. [5] |
| <i>Pouteria campechiana</i>       | Evergreen | Pennington & Sarukhán [4] |
| <i>Pouteria reticulata</i>        | Evergreen | Pennington & Sarukhán [4] |
| <i>Pouteria salicifolia</i>       | Evergreen | Tropical Plants [1]       |
| <i>Pouteria sapota</i>            | Evergreen | F. Tun-Dzul [3]           |
| <i>Pristimera celastroides</i>    | Evergreen | F. May-Pat [9]            |
| <i>Protium copal</i>              | Evergreen | Pennington & Sarukhán [4] |
| <i>Pseudobombax ellipticum</i>    | Deciduous | Tropical Plants [1]       |
| <i>Psidium salutare</i>           | Evergreen | F. May-Pat [9]            |
| <i>Psidium sartorianum</i>        | Evergreen | Sanaphre-Villanueva [8]   |
| <i>Psychotria patens</i>          | Evergreen | F. May-Pat [9]            |
| <i>Psychotria pubescens</i>       | Evergreen | F. May-Pat [9]            |
| <i>Pterocarpus rohrii</i>         | Evergreen | Tropical Plants [1]       |
| <i>Pterocereus gaumeri</i>        | Evergreen | F. May-Pat [9]            |
| <i>Randia aculeata</i>            | Evergreen | F. May-Pat [9]            |
| <i>Randia longiloba</i>           | Evergreen | F. May-Pat [9]            |
| <i>Randia obcordata</i>           | Evergreen | F. May-Pat [9]            |
| <i>Randia truncata</i>            | Evergreen | F. May-Pat [9]            |
| <i>Rhizophora mangle</i>          | Evergreen | Vázquez-Yanes, et al. [5] |
| <i>Rourea glabra</i>              | Evergreen | F. May-Pat [9]            |

|                                  |           |                           |
|----------------------------------|-----------|---------------------------|
| <i>Sabal mexicana</i>            | Evergreen | Tropical Plants [1]       |
| <i>Sabal yapa</i>                | Evergreen | Tropical Plants [1]       |
| <i>Sambucus canadensis</i>       | Deciduous | Tropical Plants [1]       |
| <i>Samyda yucatanensis</i>       | Deciduous | F. Tun-Dzul [3]           |
| <i>Sapindus saponaria</i>        | Evergreen | Pennington & Sarukhán [4] |
| <i>Sapranthus campechianus</i>   | Evergreen | F. May-Pat [9]            |
| <i>Schoepfia schreberi</i>       | Evergreen | Powers & Tiffin [11]      |
| <i>Sebastiania adenophora</i>    | Evergreen | F. Tun-Dzul [3]           |
| <i>Semialarium mexicanum</i>     | Evergreen | F. Tun-Dzul [3]           |
| <i>Senegalia gaumeri</i>         | Evergreen | Huechacona-Ruiz [6]       |
| <i>Senna atomaria</i>            | Deciduous | Sanaphre-Villanueva [8]   |
| <i>Senna peralteana</i>          | Deciduous | F. May-Pat [9]            |
| <i>Senna racemosa</i>            | Deciduous | Sanaphre-Villanueva [8]   |
| <i>Senna villosa</i>             | Deciduous | F. May-Pat [9]            |
| <i>Sideroxylon americanum</i>    | Evergreen | F. Tun-Dzul [3]           |
| <i>Sideroxylon capiri</i>        | Evergreen | Powers & Tiffin [11]      |
| <i>Sideroxylon celastrinum</i>   | Evergreen | F. May-Pat [9]            |
| <i>Sideroxylon foetidissimum</i> | Evergreen | Tropical Plants [1]       |
| <i>Sideroxylon obtusifolium</i>  | Evergreen | Huechacona-Ruiz [6]       |
| <i>Sideroxylon persimile</i>     | Evergreen | Tropical Plants [1]       |
| <i>Sideroxylon salicifolium</i>  | Evergreen | F. May-Pat [9]            |
| <i>Simarouba amara</i>           | Evergreen | Tropical Plants [1]       |
| <i>Simarouba glauca</i>          | Deciduous | Vázquez-Yanes, et al. [5] |
| <i>Simira salvadorensis</i>      | Evergreen | Pennington & Sarukhán [4] |
| <i>Solanum erianthum</i>         | Evergreen | F. May-Pat [9]            |
| <i>Spondias mombin</i>           | Deciduous | Powers & Tiffin [11]      |
| <i>Spondias purpurea</i>         | Deciduous | Powers & Tiffin [11]      |
| <i>Spondias radlkoferi</i>       | Deciduous | Naturalista [2]           |
| <i>Swartzia cubensis</i>         | Evergreen | F. Tun-Dzul [3]           |
| <i>Swartzia guatemalensis</i>    | Evergreen | Tropical Plants [1]       |
| <i>Swietenia macrophylla</i>     | Evergreen | F. Tun-Dzul [3]           |
| <i>Tabebuia chrysantha</i>       | Deciduous | Sanaphre-Villanueva [8]   |
| <i>Tabebuia guayacan</i>         | Deciduous | F. Tun-Dzul [3]           |
| <i>Tabebuia rosea</i>            | Deciduous | Powers & Tiffin [11]      |
| <i>Tabernaemontana alba</i>      | Evergreen | Sanaphre-Villanueva [8]   |
| <i>Talisia floresii</i>          | Evergreen | Earth.com [16]            |
| <i>Tecoma stans</i>              | Evergreen | Vázquez-Yanes, et al. [5] |
| <i>Thouinia paucidentata</i>     | Deciduous | Huechacona-Ruiz [6]       |
| <i>Thrinax radiata</i>           | Evergreen | Tropical Plants [1]       |
| <i>Toxicodendron radicans</i>    | Evergreen | F. May-Pat [9]            |
| <i>Trema micrantha</i>           | Evergreen | Vázquez-Yanes, et al. [5] |
| <i>Trichilia glabra</i>          | Evergreen | Huechacona-Ruiz [6]       |
| <i>Trichilia havanensis</i>      | Evergreen | Pennington & Sarukhán [4] |
| <i>Trichilia hirta</i>           | Evergreen | F. Tun-Dzul [3]           |
| <i>Trichilia minutiflora</i>     | Evergreen | F. Tun-Dzul [3]           |



|                                                   |           |                           |
|---------------------------------------------------|-----------|---------------------------|
| <i>Trophis racemosa</i>                           | Evergreen | Pennington & Sarukhán [4] |
| <i>Vachellia collinsii</i>                        | Deciduous | Tropical Plants [1]       |
| <i>Vachellia pennatula</i>                        | Deciduous | Sanaphre-Villanueva [8]   |
| <i>Vitex gaumeri</i>                              | Deciduous | Huechacona-Ruiz [6]       |
| <i>Zanthoxylum caribaeum</i>                      | Deciduous | Tropical Plants [1]       |
| <i>Zanthoxylum fagara</i>                         | Evergreen | F. Tun-Dzul [3]           |
| <i>Zanthoxylum riedelianum</i>                    | Evergreen | Pennington & Sarukhán [4] |
| <i>Zanthoxylum riedelianum subsp. kellermanii</i> | Deciduous | Tropical Plants [1]       |
| <i>Zapoteca formosa</i>                           | Evergreen | Sanaphre-Villanueva [8]   |
| <i>Zapoteca portoricensis</i>                     | Evergreen | Kewscience [7]            |
| <i>Ziziphus jujuba</i>                            | Deciduous | Kewscience [7]            |
| <i>Zuelania guidonia</i>                          | Deciduous | Powers & Tiffin [11]      |
| <i>Zygia stevensonii</i>                          | Evergreen | Kewscience [7]            |

## References

- Useful tropical plants. <http://tropical.theferns.info/>
- Naturalista. <https://www.naturalista.mx/>
- F. Tun-Dzul, experto local
- Pennington, T. D.; Sarukhán, J. *Árboles Tropicales de México: Manual Para La Identificación de Las Principales Especies*; UNAM, 2005.
- Vázquez Yanes, C.; Batis Munoz, A. I.; Alcocer Silva, M. I.; Gual Díaz, M.; Sánchez Dirzo, C. *Árboles y Arbustos Nativos Potencialmente Valiosos Para La Restauración Ecológica y La Reforestación Comisión Nacional Para El Conocimiento y Uso de La Biodiversidad*; 1999. DOI:10.13140/RG.2.2.11004.54407..
- Huechacona-Ruiz, Astrid Helena. Caracterización y modelización de los patrones fenológicos de la vegetación de diferentes edades de sucesión en un bosque tropical seco en Yucatán. PhD Thesis. Centro de Investigación Científica de Yucatán. Mérida, Yucatán, México. 2020
- Kewscience: Plants of the world online. <http://powo.science.kew.org/>
- Sanaphre-Villanueva, Lucía. Variación sucesional y espacial de caracteres y grupos funcionales de plantas leñosas en un bosque tropical seco. PhD Thesis. Centro de Investigación Científica de Yucatán. Mérida, Yucatán, México. 2016
- F. May-Pat, experto local
- Treeworld wholesale. <http://treeworldwholesale.com/>
- Powers, J. S.; Tiffin, P. Plant Functional Type Classifications in Tropical Dry Forests in Costa Rica: Leaf Habit versus Taxonomic Approaches. *Funct. Ecol.* 2010. DOI:10.1111/j.1365-2435.2010.01701.x.
- Henricus Franciscus, M. V.; Navarro Martínez, M. A. Fichas Ecológicas Árboles Maderables de Quintana Roo. In *Fichas ecológicas árboles maderables de Quintana Roo*; Fondo Mixto de Fomento a la Investigación Científica y Tecnológica CONACYT-Gobierno del Estado de Quintana Roo, México, 2007.
- Flores. <http://www.florflores.com>
- Plantas y hongos. [http://www.plantasyhongos.es/herbarium/htm/Croton\\_glabellus.htm](http://www.plantasyhongos.es/herbarium/htm/Croton_glabellus.htm)
- Plants database. <https://garden.org/plants/view/499495/Persimmon-Diospyros-acapulcensis-subsp-veraecrucis/>
- Earth.com <https://www.earth.com/earthpedia/plant>
- EcuRed. <https://www.ecured.cu>
- Flora virtual Estación Biológica El Verde. [http://floraelverde.catec.upr.edu/especie\\_info.php?id=218](http://floraelverde.catec.upr.edu/especie_info.php?id=218)
- InfoJardin, <https://fichas.infojardin.com/trepadoras/macfadyena-unguis-cati-bignonia-tweediana-una-de-gato.htm>
